# Supplementary material for: Transcriptomic and Metabolomic Analyses Reveal the Importance of Lipid Metabolism and Photosynthesis Regulation in High Salinity Tolerance in Barley (Hordeum vulgare L.) Leaves Derived from Mutagenesis Combined with Microspore Culture
Source: MDPI journal article supplement (doi:10.3390/ijms242316757), 2023-11-25
Supplement: s1 [file s1]

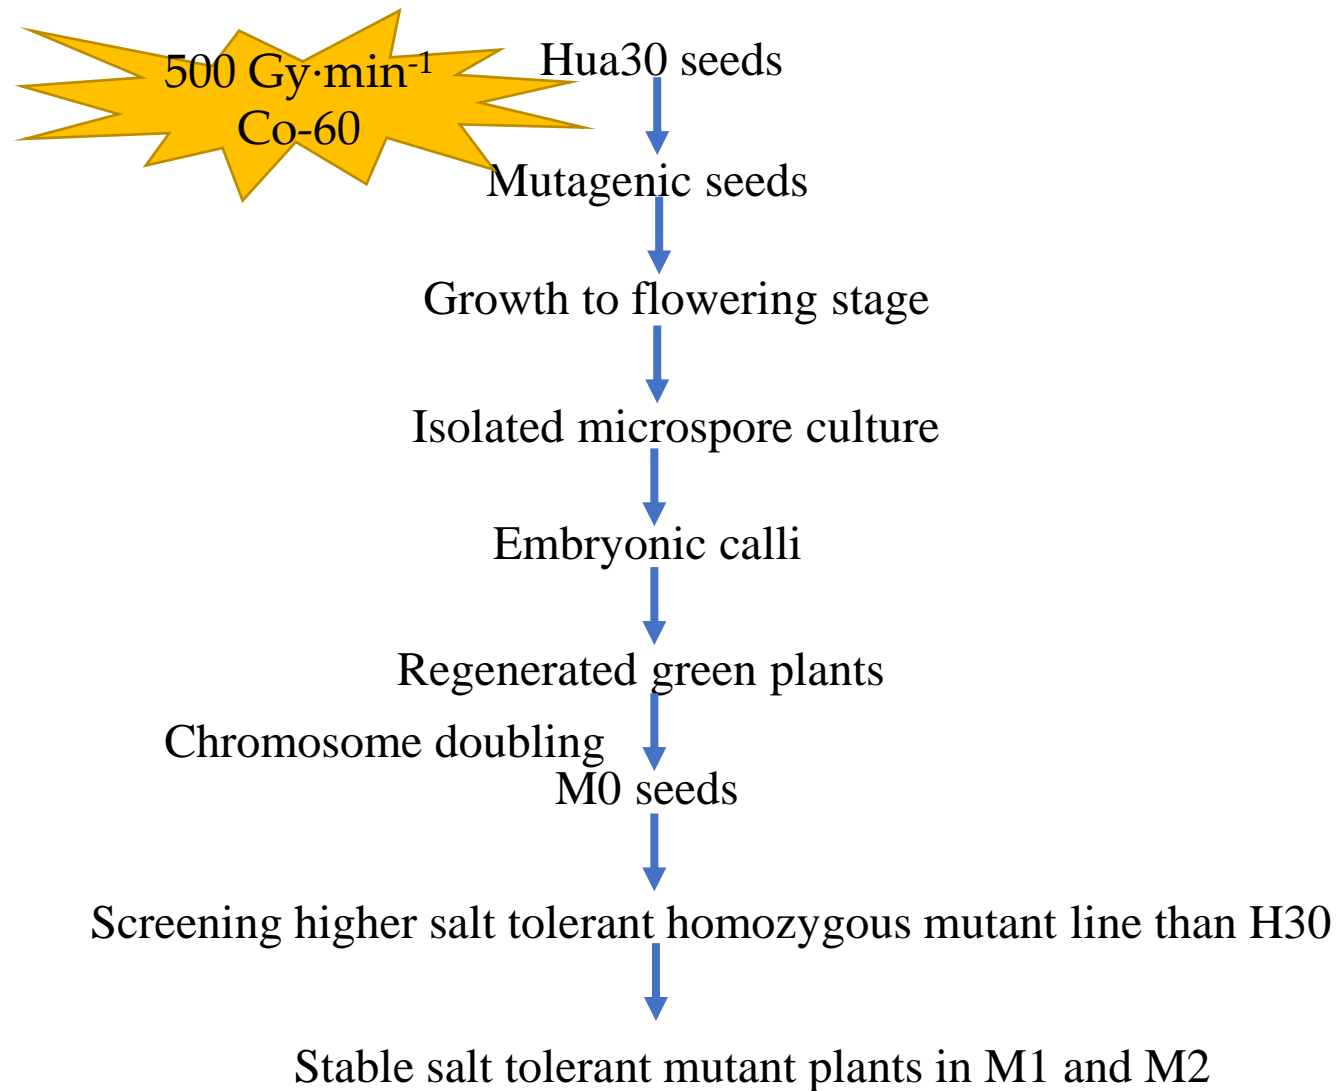

**Figure S1. Breeding scheme for the production of salt tolerant homozygous mutant plants**

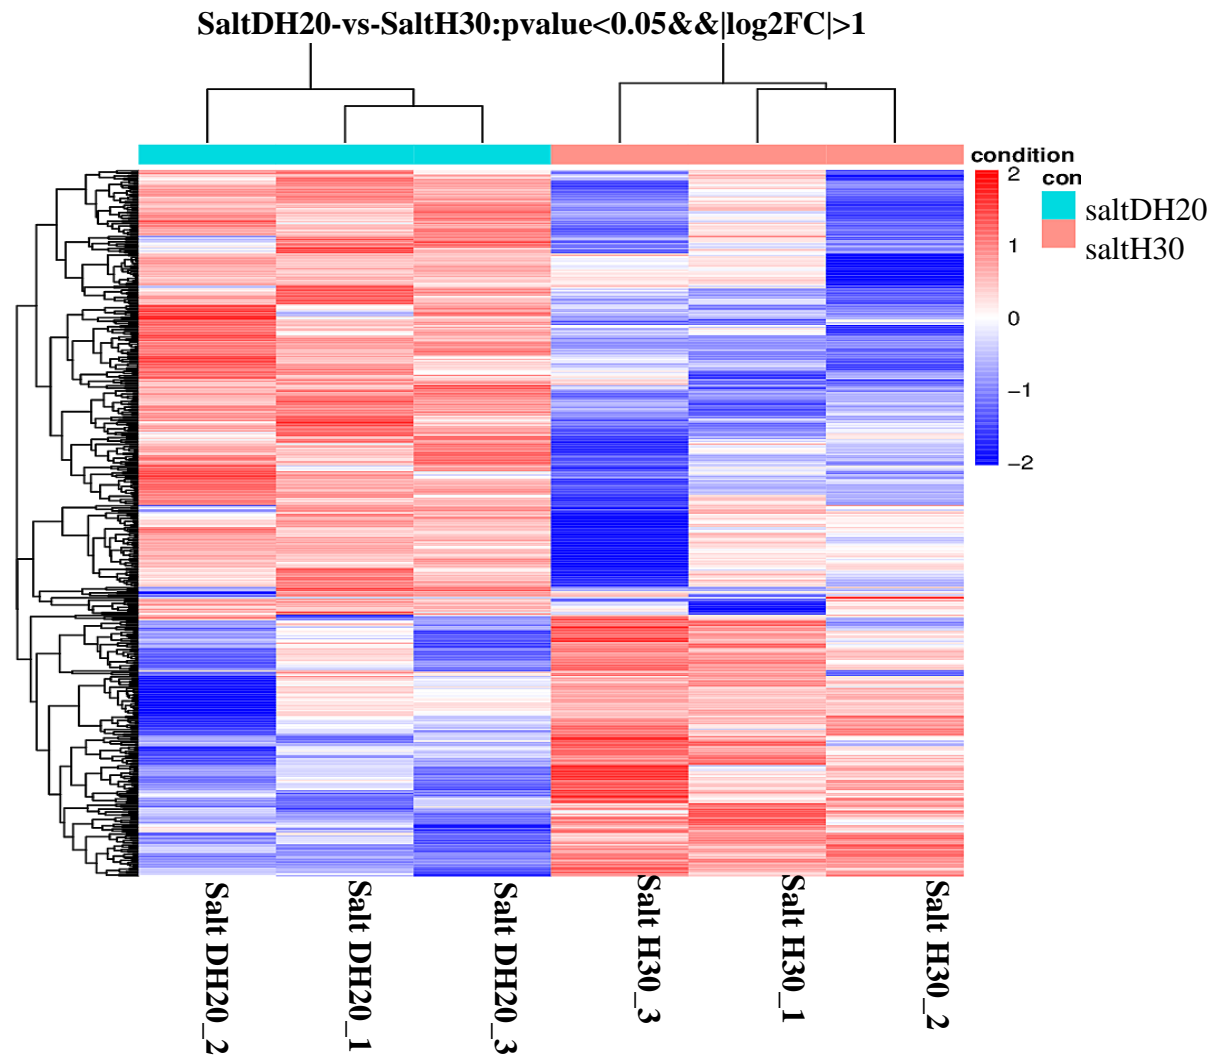

Figure S2. Heatmap analysis of specifically 462 DEGs. Samples and biological replicates of DH20 and H30 are shown. The color gradient (upper right) indicates the pattern of expression from lowly (blue) to highly (red) expressed genes and ranges from  $-2$  to  $+2$  fold changes in expression.

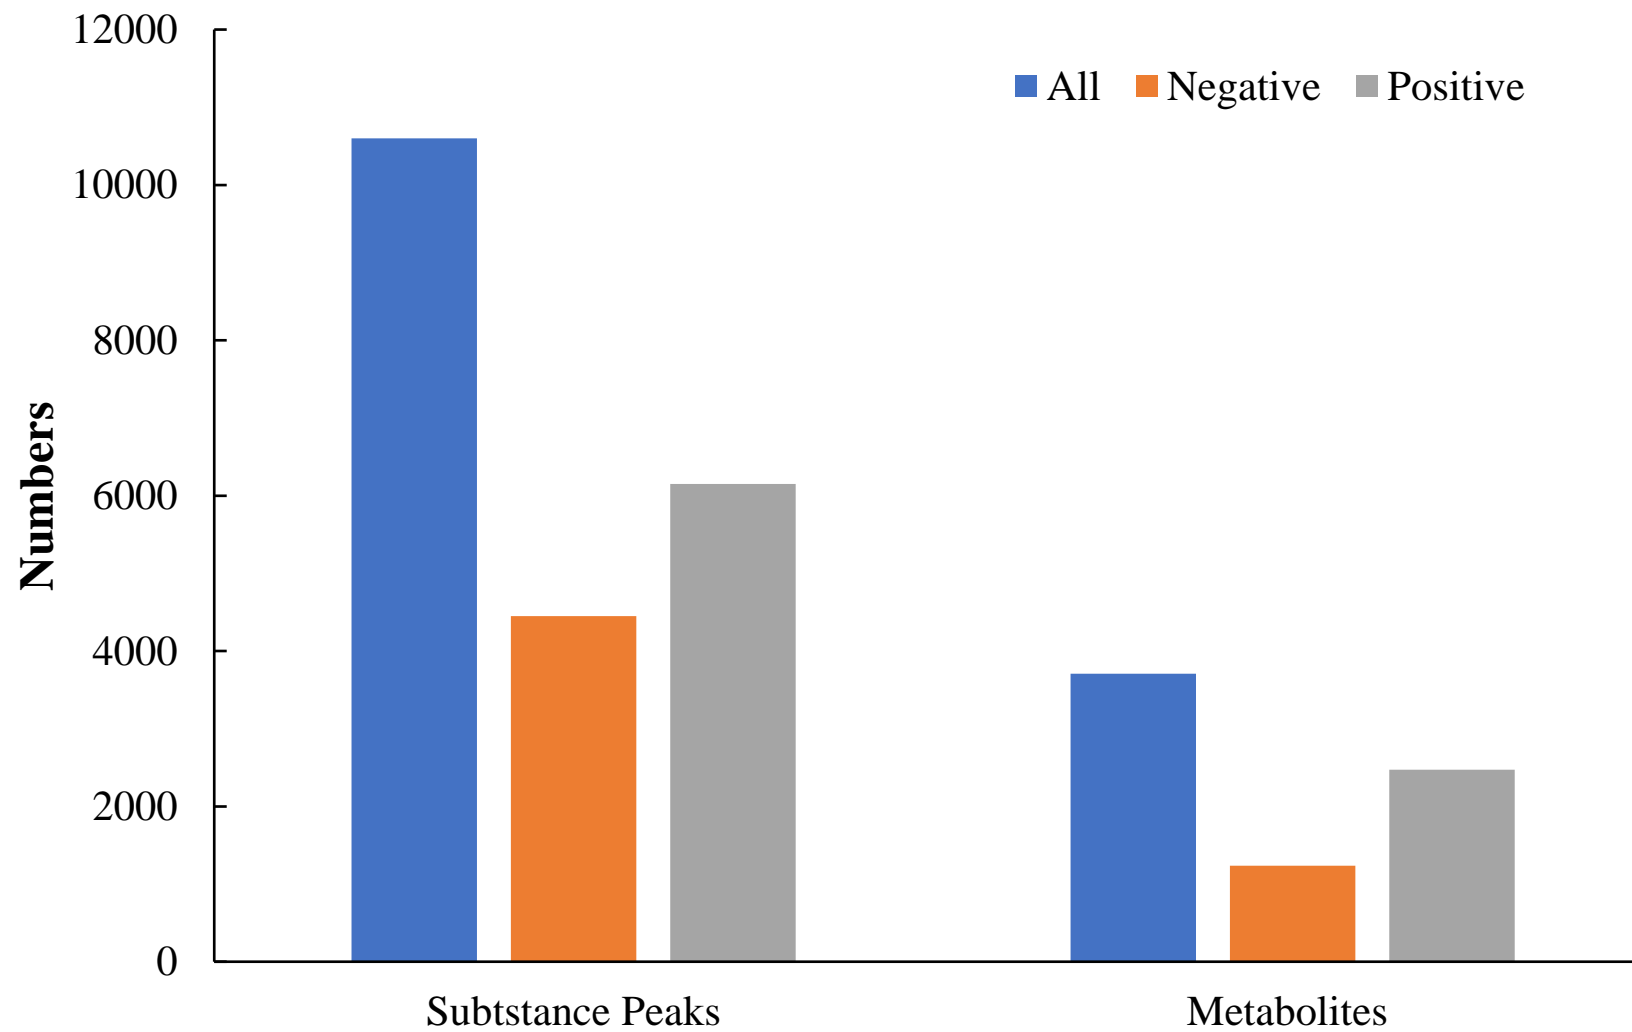

Figure S3. Statistical of substance peaks and metabolites

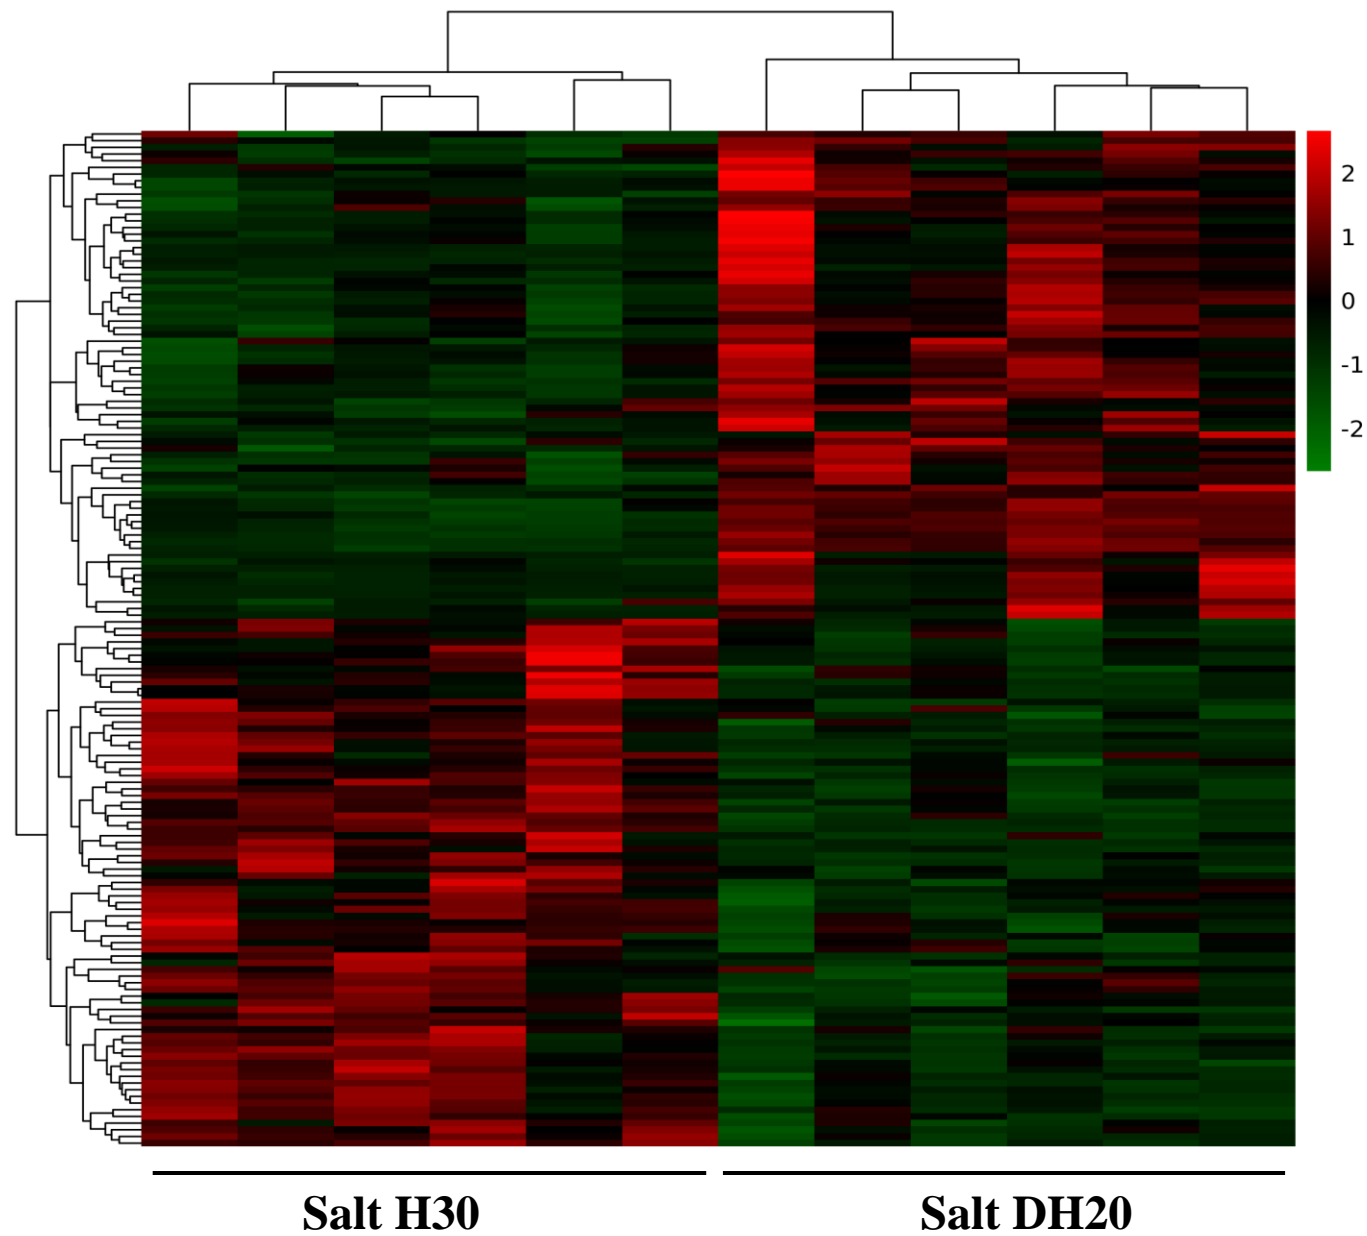

Figure S4. Heatmap analysis of 152 DAMs

**Table S1. Leaf photosynthetic properties in H30 and DH20 under control and salt conditions**

|          | LSP<br>( $\mu\text{mol m}^{-2} \text{s}^{-1}$ ) | AQE<br>( $\mu\text{mol m}^{-2} \text{s}^{-1}$ ) | Amax<br>( $\mu\text{mol m}^{-2} \text{s}^{-1}$ ) | Vcmax<br>( $\mu\text{mol m}^{-2} \text{s}^{-1}$ ) | Jmax<br>( $\mu\text{mol m}^{-2} \text{s}^{-1}$ ) | Fv'/Fm'    |
|----------|-------------------------------------------------|-------------------------------------------------|--------------------------------------------------|---------------------------------------------------|--------------------------------------------------|------------|
| CKH30    | 648±120.4b                                      | 0.03±0.002a                                     | 5.98±1.196b                                      | 16.83±2.61a                                       | 12.06±2.41a                                      | 0.52±0.01a |
| CKDH20   | 884±185.60a                                     | 0.04±0.006a                                     | 10.20±2.01a                                      | 10.83±2.05b                                       | 7.91±1.58b                                       | 0.51±0.01a |
| Salt H30 | 216±38.88B                                      | 0.007±0.0014A                                   | 0.95±0.19B                                       | 1.32±0.26B                                        | 0.74±0.15B                                       | 0.34±0.06B |
| SaltDH20 | 256±43.52A                                      | 0.007±0.00105A                                  | 1.25±0.26A                                       | 1.55±0.31A                                        | 1.32±0.26A                                       | 0.46±0.03A |

LSP, light saturation point; AQE, apparent quantum efficiency; Amax, maximum net photosynthetic rate; Vcmax, maximum rate of RuBP carboxylation; Jmax, maximum rates of electron transport; Fv'/Fm', the maximal photochemical efficiency of PSII.

**Table S2. Summary of quality control for RNA-seq data**

| Sample      | Raw_reads | Raw_bases | Clean_reads | Clean_bases | Valid_bases | Q30    | GC     |
|-------------|-----------|-----------|-------------|-------------|-------------|--------|--------|
| CK DH20_1   | 69.67M    | 10.45G    | 61.17M      | 8.81G       | 84.26%      | 90.46% | 56.59% |
| CK DH20_2   | 64.59M    | 9.69G     | 57.34M      | 8.46G       | 87.28%      | 90.87% | 56.98% |
| CK DH20_3   | 69.37M    | 10.41G    | 57.08M      | 8.10G       | 77.85%      | 87.61% | 56.29% |
| CK H30_1    | 71.97M    | 10.80G    | 54.67M      | 7.74G       | 71.69%      | 84.22% | 57.41% |
| CK H30_2    | 67.21M    | 10.08G    | 56.73M      | 8.36G       | 82.91%      | 88.57% | 56.32% |
| CK H30_3    | 46.54M    | 6.98G     | 41.49M      | 6.09G       | 87.20%      | 89.87% | 56.48% |
| Salt DH20_1 | 65.79M    | 9.87G     | 63.78M      | 9.12G       | 92.45%      | 95.04% | 55.29% |
| Salt DH20_2 | 85.30M    | 12.79G    | 49.79M      | 7.10G       | 55.48%      | 74.46% | 57.34% |
| Salt DH20_3 | 61.69M    | 9.25G     | 59.76M      | 8.61G       | 93.06%      | 94.94% | 55.84% |
| Salt H30_1  | 69.30M    | 10.39G    | 61.69M      | 8.88G       | 85.45%      | 91.06% | 55.92% |
| Salt H30_2  | 68.00M    | 10.20G    | 54.43M      | 7.89G       | 77.32%      | 85.13% | 56.23% |
| Salt H30_3  | 63.82M    | 9.57G     | 62.35M      | 8.86G       | 92.51%      | 95.66% | 54.94% |

Table S3. Primer information for qRT-PCR

| Gene                    | primer sequence<br>(5'-3') | primer sequence<br>(3'-5') |
|-------------------------|----------------------------|----------------------------|
| <i>HORVU1Hr1G067480</i> | TGTGCCCCATACTCAAAACA       | GTATCGCCTCAAGGATGGAA       |
| <i>HORVU3Hr1G056830</i> | AGGTGTACGACCACCTCTGG       | GCCCTACCTCAACCATCTCA       |
| <i>HORVU1Hr1G071890</i> | GAATCTGGCCTTTTGGATGA       | TTGGTCAATGCAACACAGGT       |
| <i>HORVU7Hr1G050660</i> | AGTACCTGGGAGGGATGGAG       | TGGTTTCATGAGCTGGTACG       |
| <i>HORVU4Hr1G006850</i> | TGCATGGTGACTGGTGATCT       | ACTCTTGACGAGGACGCAGT       |
| <i>HORVU1Hr1G093460</i> | CTACACCATCCCCGAAGAGA       | ACCAAACCAGCATTACCTC        |
| <i>HORVU2Hr1G115960</i> | GCGTTCTGCATGAATCTTGA       | TGCTTGGTATTGTTGGGTGA       |
| <i>HORVU5Hr1G117910</i> | ACCGTCGGCTTATATCAACG       | GAACACAAGGGGGTCATGCTT      |
| <i>HORVU4Hr1G011160</i> | CGTTAGCAGGCATCAGTCAA       | TTCTTTCCAAAACCCACGAC       |
| <i>HORVU5Hr1G095060</i> | CCTCTTCGTGGACAAGGTGT       | CCTGCCATGGTCATCTACCT       |
| <i>HORVU1Hr1G074460</i> | CAATGGTTGACACCGAACTG       | CTGGGATTTTCAGCACCAACT      |
| <i>HORVU7Hr1G007220</i> | TGACTGGTCTGGTTGAGCTG       | CTGCTCCTCCTTGTCCTTTG       |
